# Supplementary material
Source: Springer Nature journal article supplement (https://www.springermedizin.de/resource/supplementary/12888_2014_1615_MOESM2_ESM.pdf/9480970)
Supplement: MOESM2 [file 9480970]

## Questionnaire about treatment

1. Do you think you should have been hospitalized?

|            |   |         |   |           |
|------------|---|---------|---|-----------|
| 1          | 2 | 3       | 4 | 5         |
| Not at all |   | Neutral |   | Very much |

2. Is your circumstance in the ward appropriate?

|            |   |         |   |           |
|------------|---|---------|---|-----------|
| 1          | 2 | 3       | 4 | 5         |
| Not at all |   | Neutral |   | Very much |

3. Do current medications suit you?

|            |   |         |   |           |
|------------|---|---------|---|-----------|
| 1          | 2 | 3       | 4 | 5         |
| Not at all |   | Neutral |   | Very much |

4. How is the relationship between you and your ward staffs?

|      |   |         |   |           |
|------|---|---------|---|-----------|
| 1    | 2 | 3       | 4 | 5         |
| Poor |   | Average |   | Excellent |

5. Have you been given sufficient explanation about the treatment?

|            |   |         |   |           |
|------------|---|---------|---|-----------|
| 1          | 2 | 3       | 4 | 5         |
| Not at all |   | Neutral |   | Very much |

6. How are you satisfied with the treatment?

|            |   |         |   |           |
|------------|---|---------|---|-----------|
| 1          | 2 | 3       | 4 | 5         |
| Not at all |   | Neutral |   | Very much |

Please feel free to write your comment for the treatment below.
